# Supplementary material for: DNA methylation mediated down-regulation of ANGPTL4 promotes colorectal cancer metastasis by activating the ERK pathway
Source: PubMed Central journal article supplement (PMC8364648; doi:10.7150/jca.52338), 2021-07-13
Supplement: jcav12p5473s1.pdf [file jcav12p5473s1.pdf]

**Table S1** Primer sequences

| Genes      | Primer sequences                                                                   |
|------------|------------------------------------------------------------------------------------|
| ANGPTL4    | F: 5'-AAAGCAAGGTCTCCCCACAAG-3'<br>R: 5'-GAATTACTGTCCAGCCTCCATC-3'                  |
| E-cadherin | F: 5'-GGTAGGTGAATTTTTAGTTAATTAGTGGTA-3'<br>R: 5'-ACCCATAACTAACCAAAAACACCA-3'       |
| ZO-1       | F: 5'-TGGACCAGCTAACCAACGACAAAG-3'<br>R: 5'-GGATTGCAGGGTGCTTTCGGCT-3'               |
| vimentin   | F: 5'-TCAGAGAGAGGAAGCCTA-3'<br>R: 5'-CTTGACATTGAGAGTTGCCACCCTGCCTGTTGGAACTTTTCC-3' |
| N-cadherin | F: 5'-CAACCGTCTTAATCAGGAGTG-3'<br>R: 5'-GTTCGAACGATGGGCAGCCGGTAG-3'                |
| GAPDH      | F: 5'-GTGGACCTGACCTGCCGTCT-3'<br>R: 5'-GGAGGAGTGGGTGTCGCTGT-3'                     |
